# Supplementary material
Source: PubMed Central journal article supplement (PMC4650425)
Supplement: cr2015122x1.pdf [file cr2015122x1.pdf]

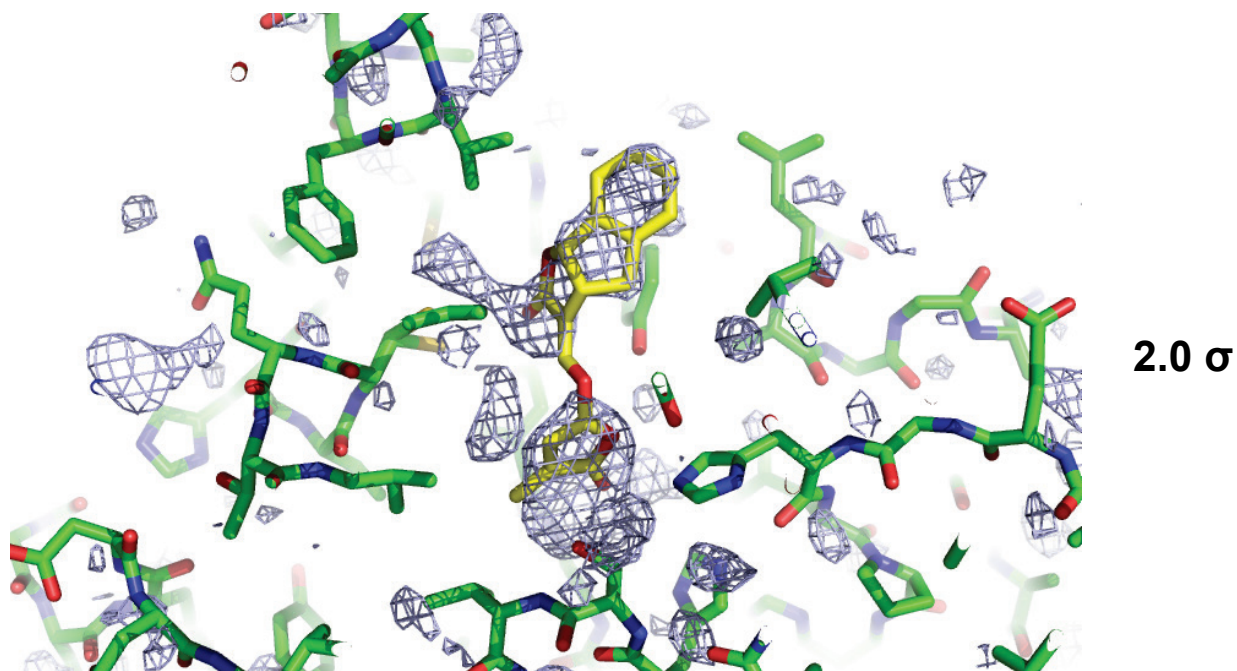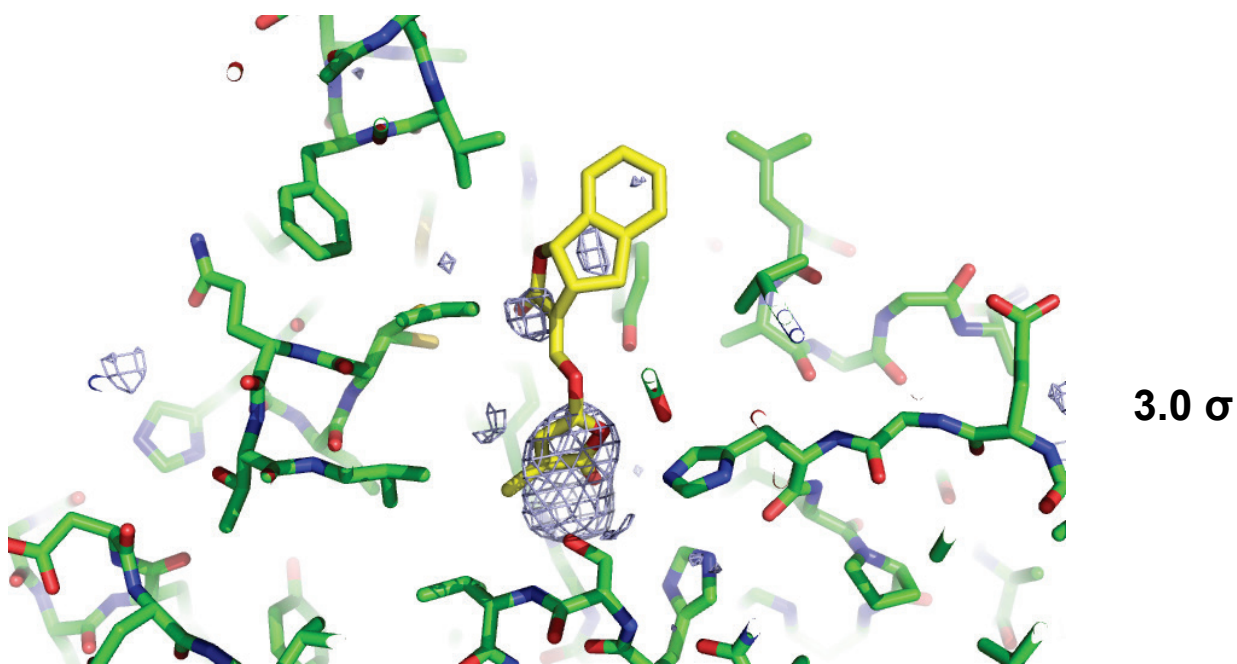

Supplementary information, Figure S1 Fo-Fc electron density maps calculated from the GR24 deleted model, contoured at 2  $\sigma$  (top) or 3  $\sigma$  (bottom).
