# Supplementary material
Source: PubMed Central journal article supplement (PMC4650425)
Supplement: cr2015122x2.pdf [file cr2015122x2.pdf]

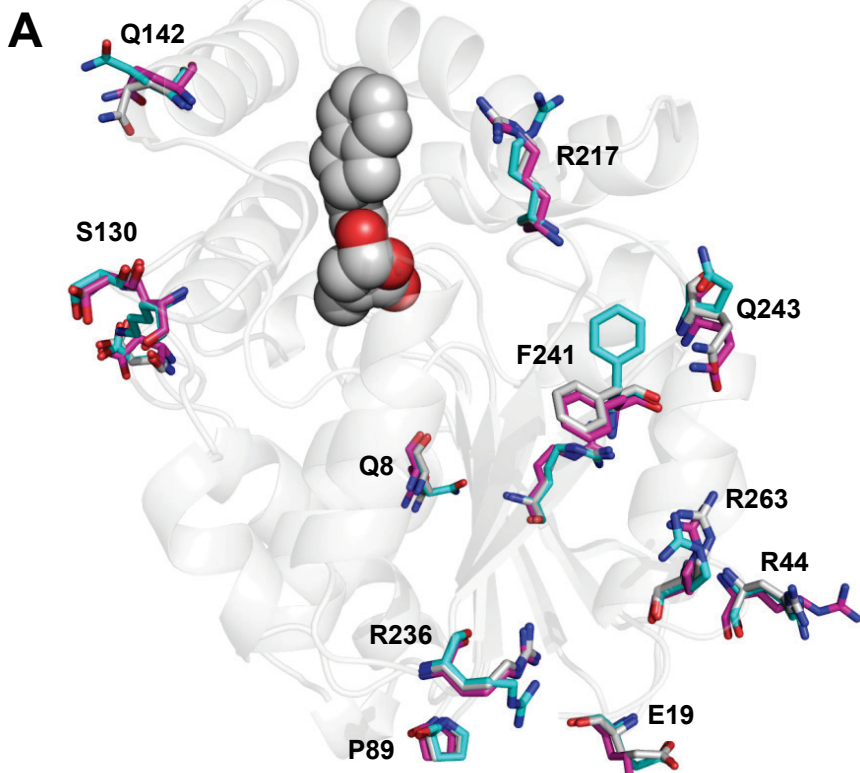

D14-GR24

D14-GR24

D14-lactone

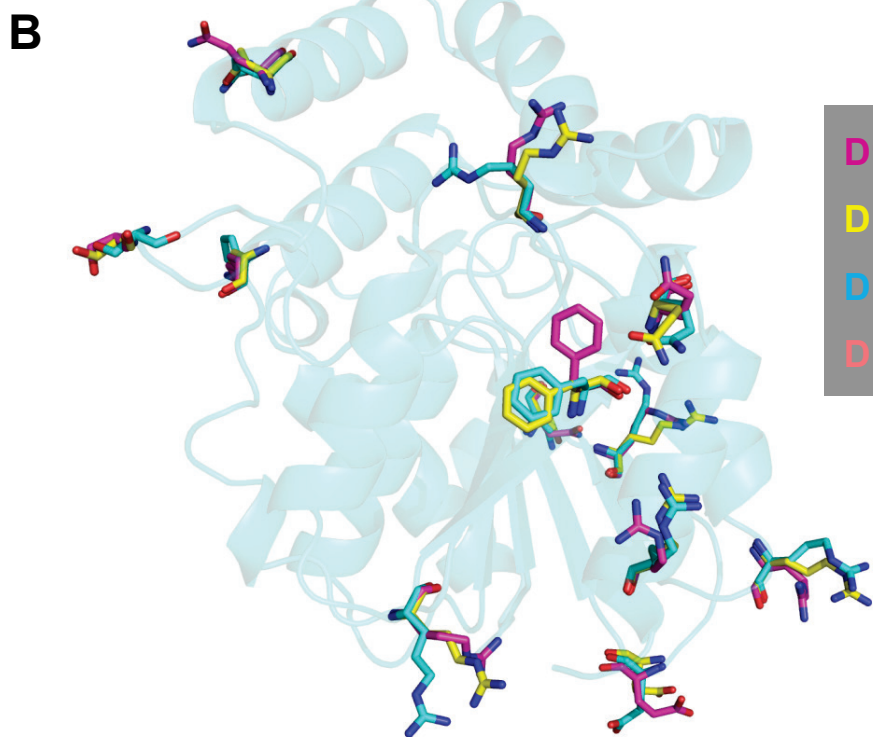

D14 apo (PDB 4IH9, mol-A)

D14 apo (PDB 4IH9, mol-B)

D14 apo (PDB 3VXK)

D14/D-ring (PDB 3WIO)

**Supplementary information, Figure S2 A group of flexible charged surface residues adopts different conformations in six different D14 crystal structures.** **A.** Structure overlay of the two complexes found in the D14/GR24 complex structure (grey and cyan) with the structure of D14 bound to a GR24 hydrolysis intermediate (PDB 4IHA<sup>24</sup>, magenta). **B.** Structure overlay of three D14 apo complexes (PDB 4IH9<sup>24</sup>, magenta and yellow, and 3VXK<sup>26</sup>, cyan) or D14 bound to the D-ring GR24 hydrolysis product (PDB 3WIO<sup>26</sup>, pink). Transparent ribbon presentations with conformationally dynamic surface residues shown in stick presentation.
