# Supplementary material
Source: PubMed Central journal article supplement (PMC4650425)
Supplement: cr2015122x4.pdf [file cr2015122x4.pdf]

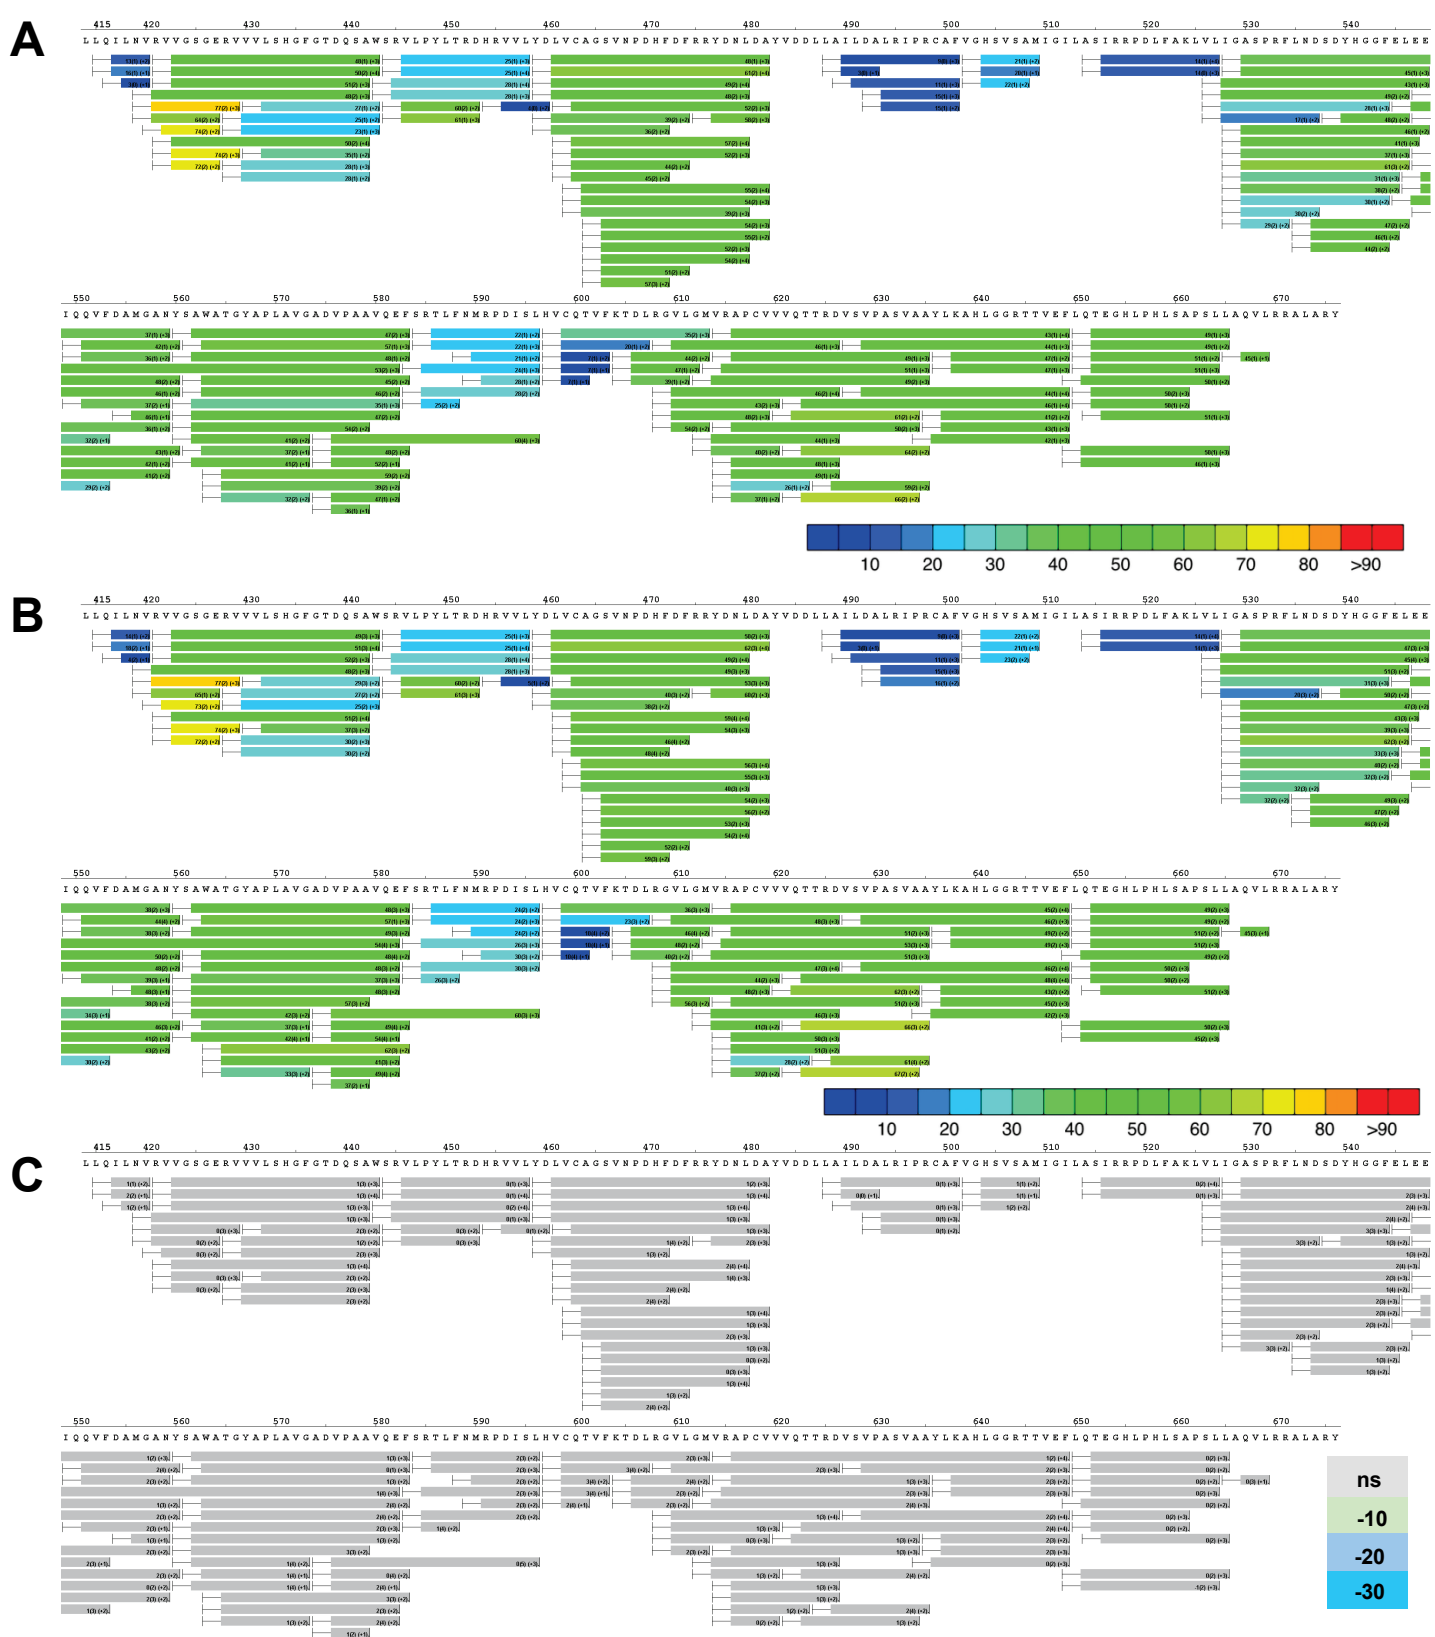

**Supplementary information, Figure S4 HDX perturbation map comparing deuterium exchange of apo D14 to exchange in the D14+GR24 complex.** HDX heat maps of apo D14 (A) and of D14+GR24 (B). The bars below the sequences represent the peptide fragments resolved by mass spectrometry and the color of the bars the relative HDX protection. (C) Differences between HDX of (A) and (B) (HDX perturbation map). All peptides resolved show a lack of significant change in protection (color codes below the sequences for (A) and (B) and at bottom right for (C), ns: no significant change), consistent with the absence of surface conformational changes between the D14 and D14/GR24 crystal structures.
