# Supplementary material
Source: PubMed Central journal article supplement (PMC4650425)
Supplement: cr2015122x5.pdf [file cr2015122x5.pdf]

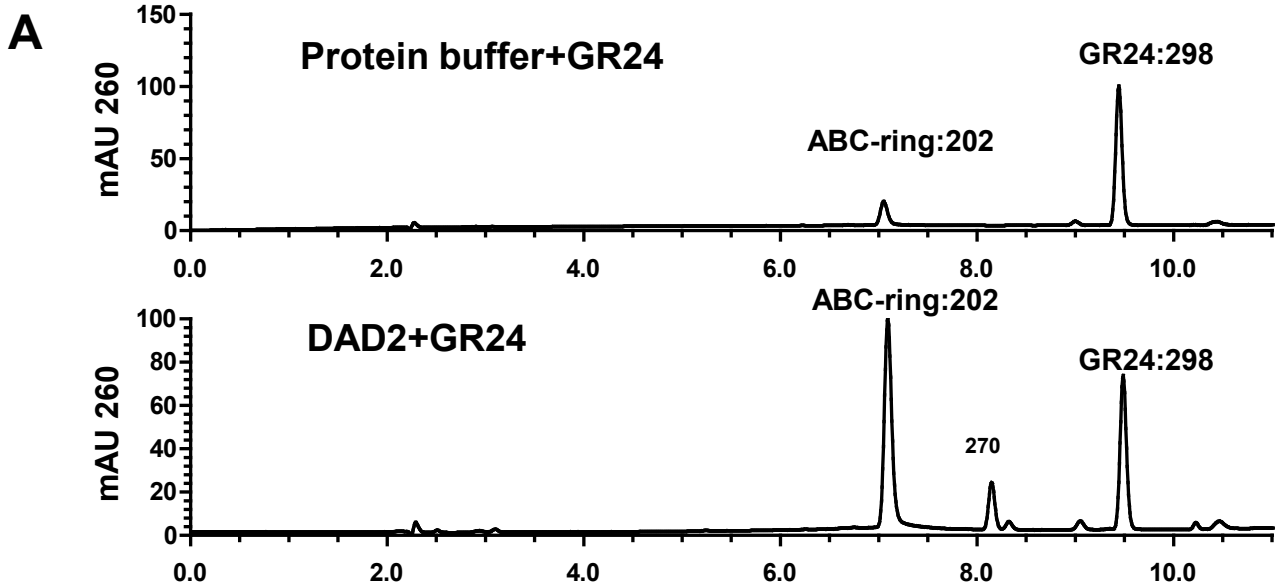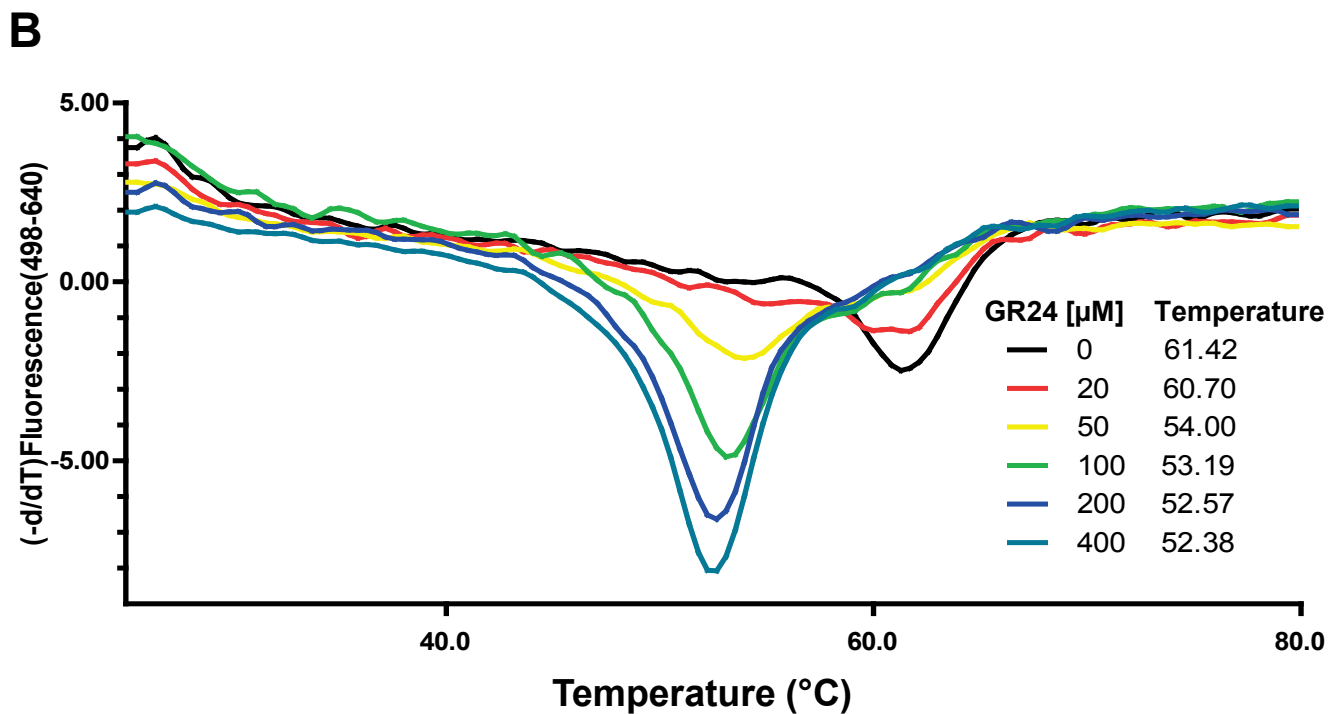

**Supplementary information, Figure S5 Binding of GR24 to petunia DAD2 induces GR24 hydrolysis and DAD2 destabilization. (A)** Mass spectrometric identification of the ABC-ring and D-ring products of GR24 separated by UPLC as described<sup>24</sup>. Top: absence, bottom: presence of DAD2. **(B)** Melting temperature ( $T_m$ ) curves of DAD2 in the presence of the indicated concentrations of GR24.
