# Supplementary material
Source: PubMed Central journal article supplement (PMC4650425)
Supplement: cr2015122x6.pdf [file cr2015122x6.pdf]

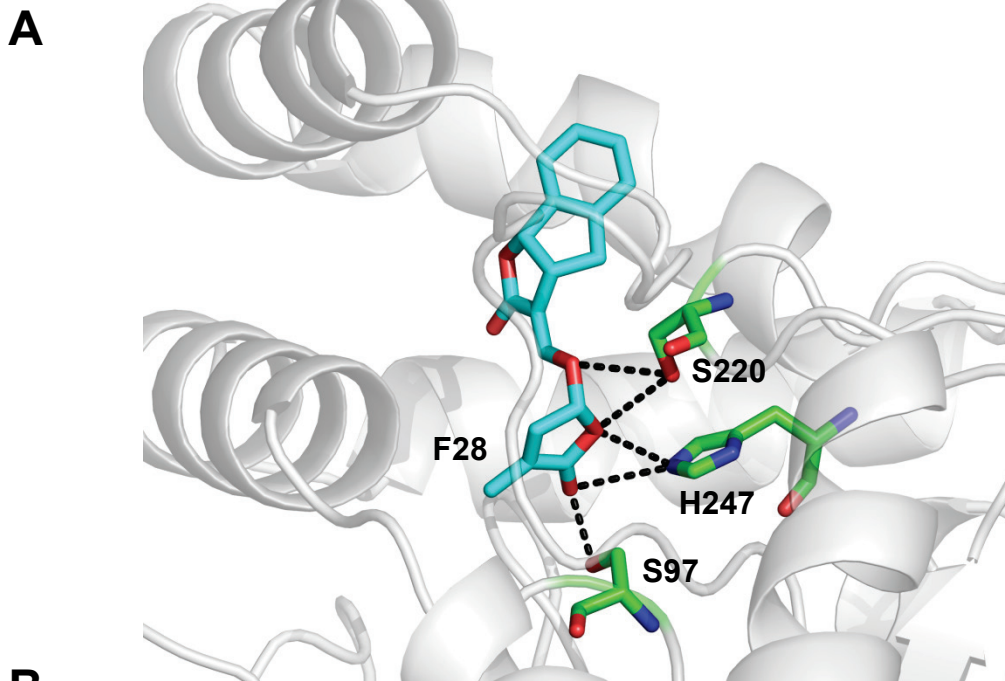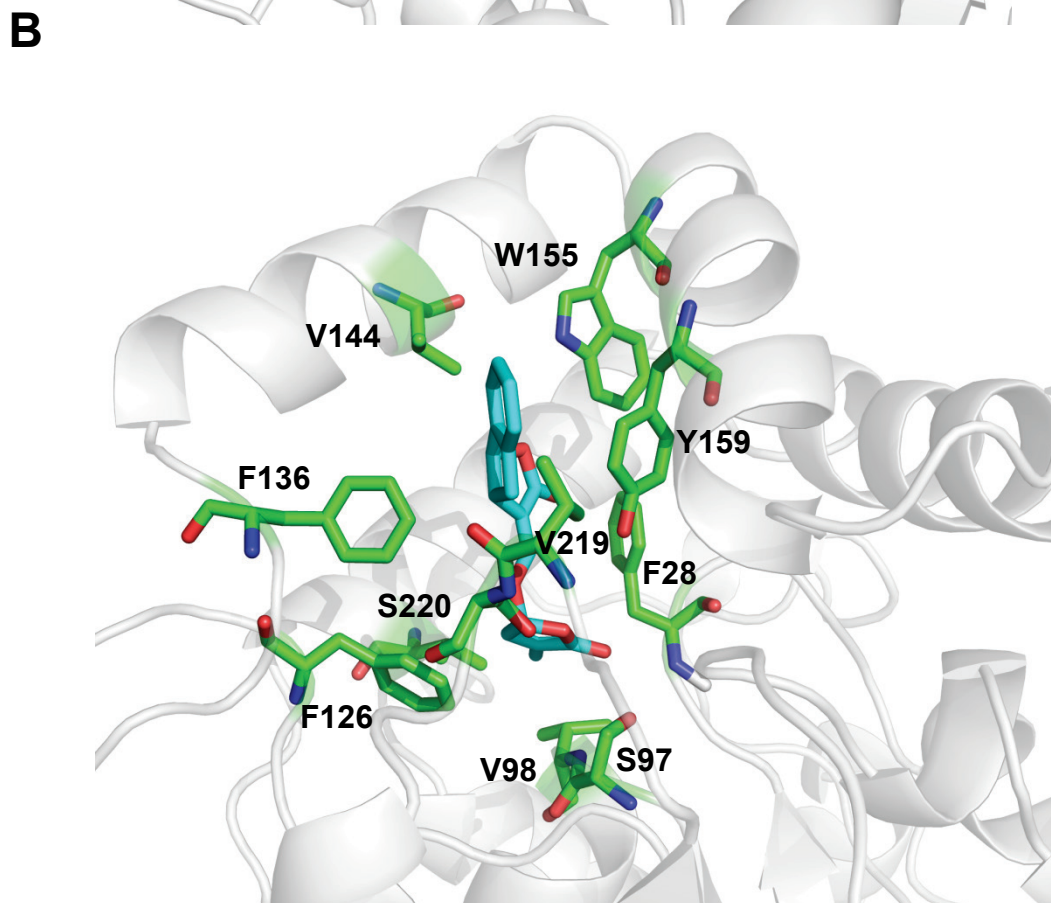

Supplementary information, Figure S6 Details of charge (A) and hydrophobic (B) interactions between GR24 and D14 ligand-binding pocket residues. Hydrogen bonds are indicated by dashed lines.
