# Supplementary material
Source: PubMed Central journal article supplement (PMC4650425)
Supplement: cr2015122x7.pdf [file cr2015122x7.pdf]

**A**

| Stereo-isomer | Grid score (sum) | Grid score (VdW) | Grid score (es) | Internal energy |
|---------------|------------------|------------------|-----------------|-----------------|
| 5DS           | -39.7            | -34.4            | -5.3            | 2.8             |
| Ent-5DS       | -15.5            | -16.3            | 0.8             | 2.2             |
| 4DO           | -22.6            | -20.4            | -2.3            | 1.7             |
| Ent-4DO       | 0.04             | 2.2              | -2.1            | 3.2             |

**B****GR24 model**  
5DS-GR24**GR24 model**  
ent5DS-GR24**GR24 model**  
4DO-GR24**GR24 model**  
ent4DO-GR24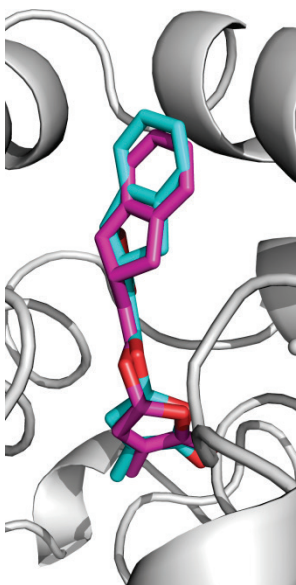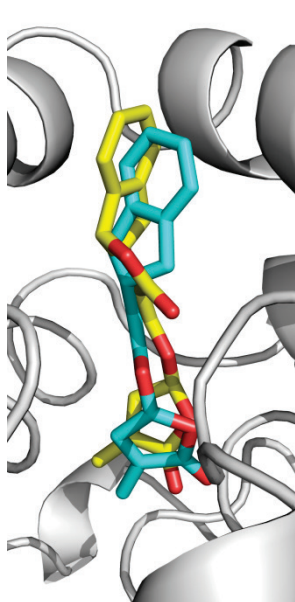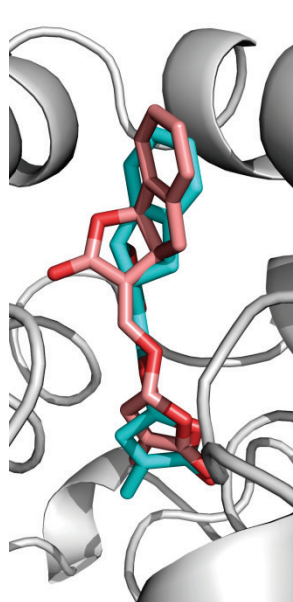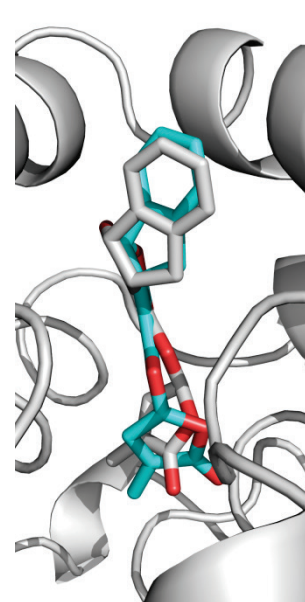

**Supplementary information, Figure S7 Unbiased computational docking of GR24 stereoisomers in the D14 LBP. (A)** Docking scores for the four different GR24 stereoisomers. The Grid score (kcal/mole) indicates the energy component of Van-der-Waals (VdW) and electrostatic (es) interactions between ligand and pocket residues, and the internal energy (kcal/mole) the energy of the ligand geometry (i.e., angles, bond length and clashes within the ligand itself). **(B)** Docked structures overlaid with the density-based structure model of GR24.
