# Supplementary material
Source: PubMed Central journal article supplement (PMC4650425)
Supplement: cr2015122x8.pdf [file cr2015122x8.pdf]

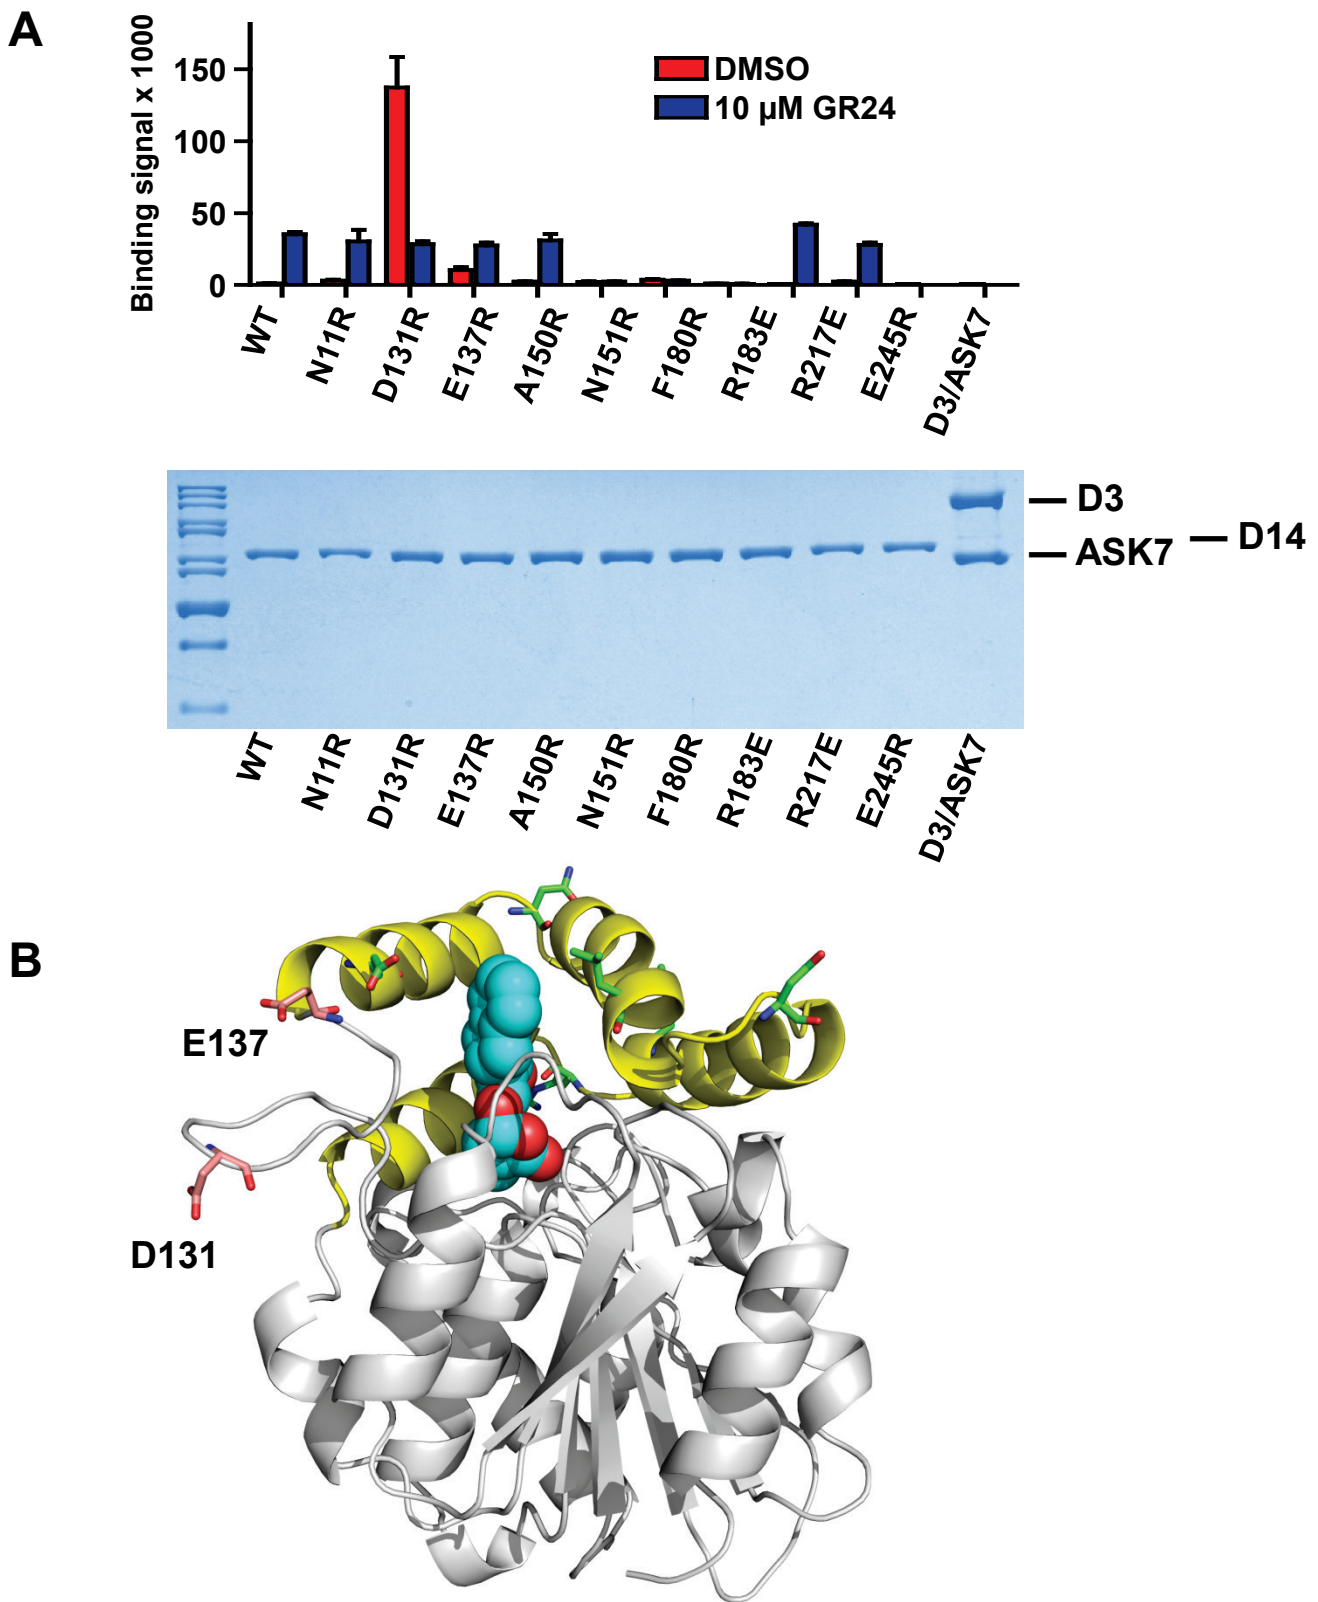

**Supplementary information, Figure S8 Charge reverse mutations of two acidic D14 residues cause SL-independent D3 interaction.** (A) Top: AlphaScreen luminescence proximity assay between biotinMBP-D14 and His8MBP-D3/Ask7 in the presence and absence of 10  $\mu$ M GR24. Below: SDS PAGE gel with purified wildtype and mutant proteins. (B) Ribbon diagram of D14/GR24. D131 and E137, whose replacements with positively charged arginine residues caused D14 to interact ligand-independently with D3, are shown as pink stick models, while residues whose mutations disrupted D14-D3 interactions are shown as green stick models.
