# Supplementary material
Source: PubMed Central journal article supplement (PMC4650425)
Supplement: cr2015122x10.pdf [file cr2015122x10.pdf]

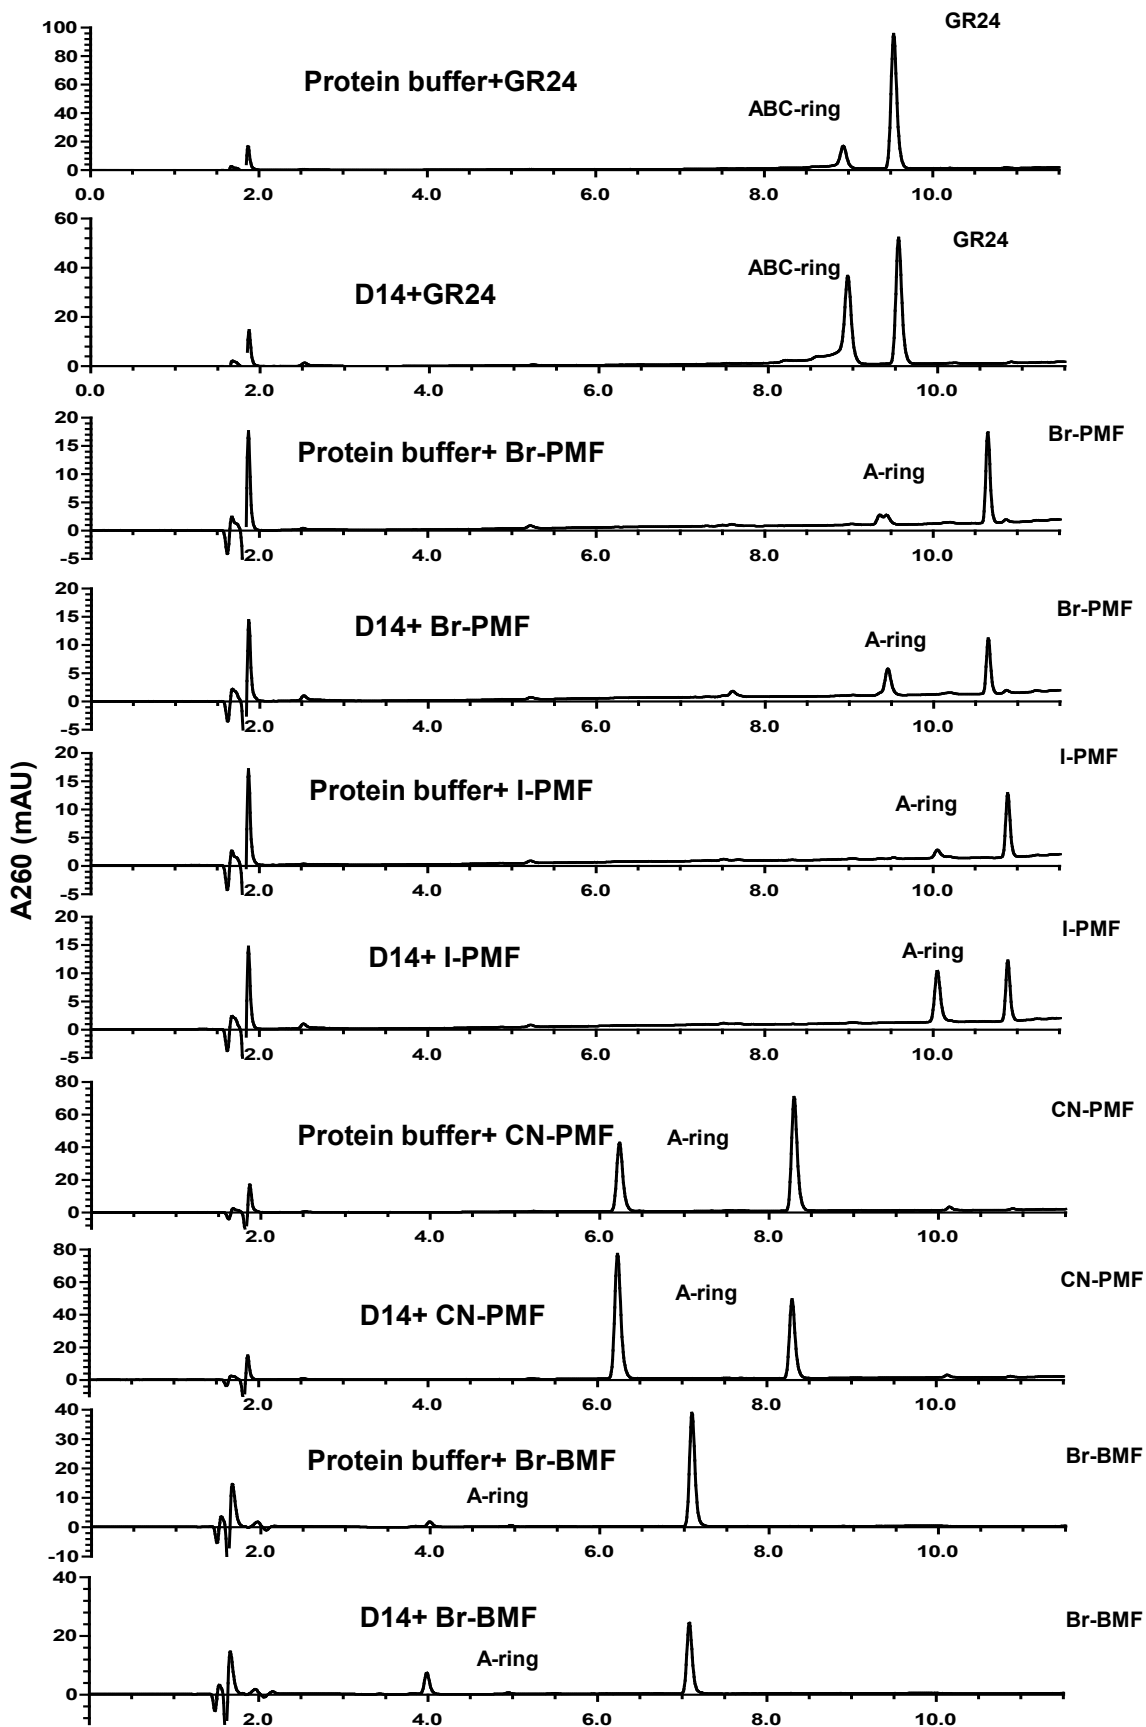

**Supplementary information, Figure S10** SL analogs analyzed in Fig. 8-10 are hydrolyzed by D14. Mass spectrometric identification of the hydrolysis products separated by UPLC as described.
