# Supplementary material
Source: PubMed Central journal article supplement (PMC4650425)
Supplement: cr2015122x11.pdf [file cr2015122x11.pdf]

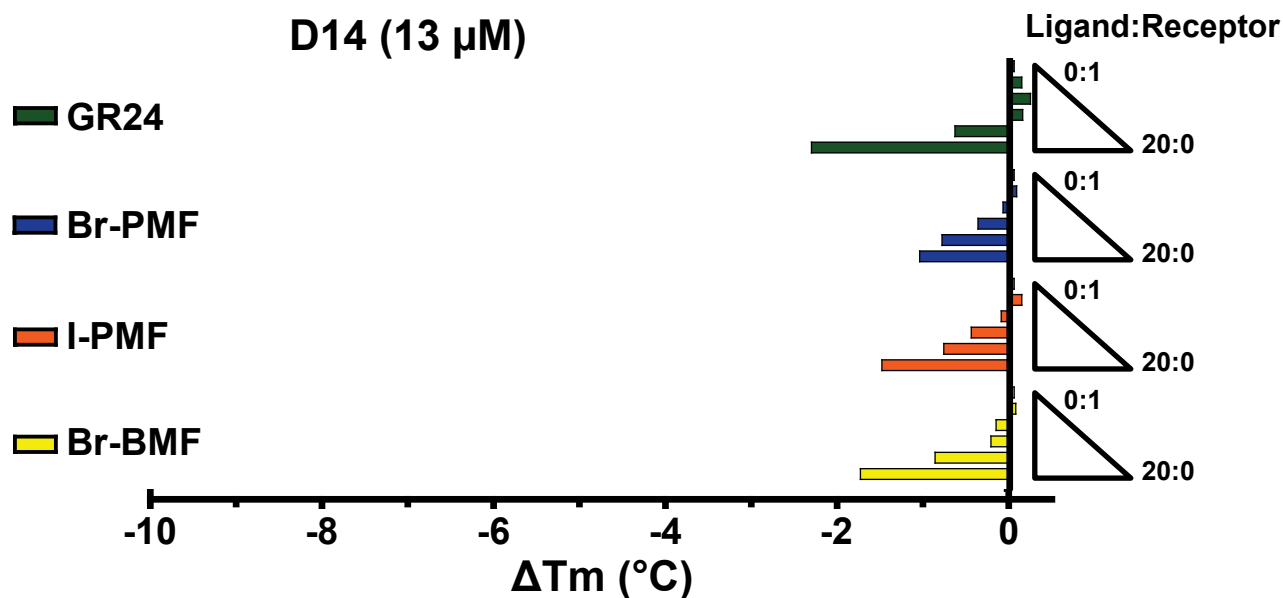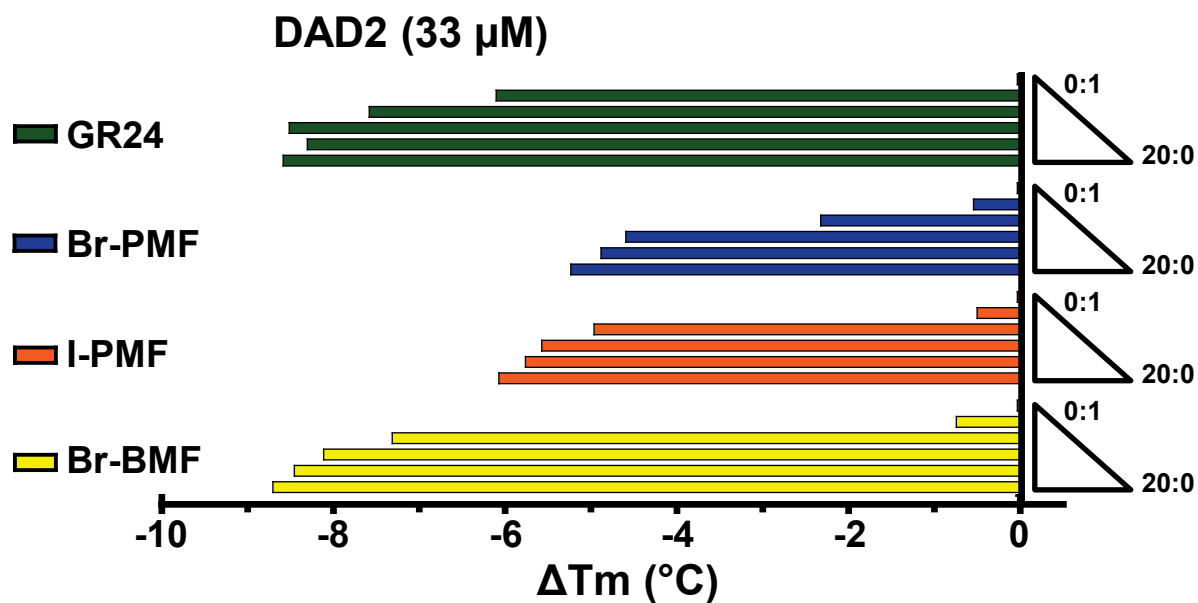

**Supplementary information, Figure S11. Thermal destabilization of D14 and DAD2 by SL analogs.** Colored bars represent the change in  $T_m$  (midpoint temperature between native and unfolded protein) relative to apo receptor, as determined by thermostability shift assay (TSA). Top: D14, Bottom: DAD2. The Y-axes indicate the molar ratios of ligand to receptor (0:1 [no ligand=apo receptor], 1:1, 2.5:1, 5:1, 10:1, 20:1 [20-fold ligand excess over receptor])
