# Supplementary material
Source: PubMed Central journal article supplement (PMC4650425)
Supplement: cr2015122x13.pdf [file cr2015122x13.pdf]

**Table S1. Statistics of D14/GR24 complex data sets and structure refinement**

| PDB code                       | 5DJ5                                              |
|--------------------------------|---------------------------------------------------|
| <b>Data collection</b>         |                                                   |
| APS beam line                  | SSRF-BL17U-MX                                     |
| Space group                    | P212121                                           |
| Resolution, Å                  | 40-2.4(2.53-2.40)                                 |
| Cell parameters, Å, °          | a=48.4, b=87.9, c=118.6; $\alpha=\beta=\gamma=90$ |
| Total/Unique reflections       | 121345/17932                                      |
| Completeness, %                | 87.7 (81.2)                                       |
| I/ $\sigma$                    | 14.6 (4.3)                                        |
| Redundancy                     | 6.8 (7.1)                                         |
| Rsym                           | 0.065 (0.136)                                     |
| CC1/2                          | 0.996 (0.854)                                     |
| <b>Structure determination</b> |                                                   |
| Resolution, Å                  | 39.9-2.4 (2.49-2.40)                              |
| No. reflections                | 17868 (1254)                                      |
| NCS molecules                  | 2                                                 |
| No. residues                   | 533                                               |
| No. solvent molecules          | 163                                               |
| No. of non-H atoms             | 4322                                              |
| Rcryst (%)                     | 18.8 (23.4)                                       |
| Rfree (%)                      | 22.4 (28.7)                                       |
| rmsd bonds, Å                  | 0.008                                             |
| rmsd angles, °                 | 1.15                                              |
| <b>B factor, Å<sup>2</sup></b> |                                                   |
| Wilson B                       | 24.5                                              |
| Protein                        | 28.5                                              |
| Ligand                         | 55.1                                              |
| Water                          | 32.2                                              |
| Overall                        | 28.8                                              |
| Ramachandran: favored (%)      | 99.1                                              |
| Ramachandran: outlier (%)      | 0.0                                               |
| Molprobity score               | 1.12                                              |
